# Supplementary material
Source: PubMed Central journal article supplement (PMC3183755)
Supplement: mmc1.pdf [file mmc1.pdf]

# Dynamic Role of Cross-Linking Proteins in Actin Rheology

Taeyoon Kim,<sup>†</sup> Wonmuk Hwang,<sup>‡</sup> and Roger D. Kamm<sup>§</sup>

<sup>†</sup>Institute for Biophysical Dynamics, University of Chicago, Chicago, Illinois; <sup>‡</sup>Department of Biomedical Engineering and Materials Science and Engineering Program, Texas A&M University, College Station, Texas; and <sup>§</sup>Department of Mechanical and Biological Engineering, Massachusetts Institute of Technology, Cambridge, Massachusetts

## Supporting Material

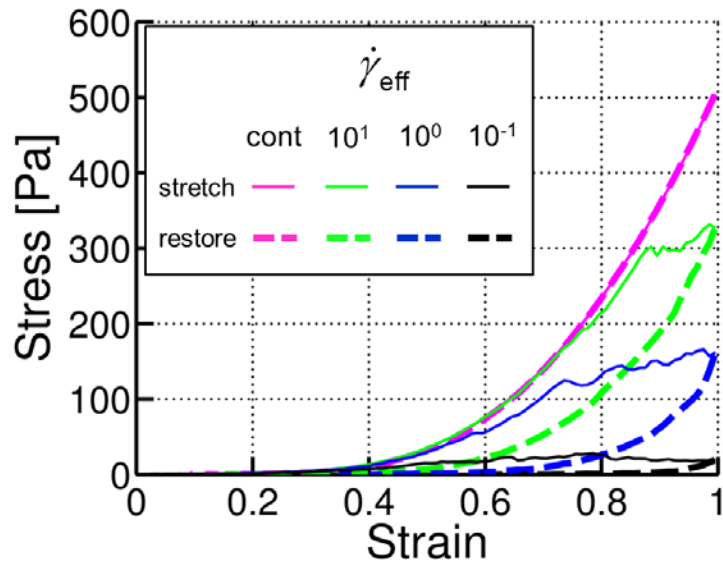

FIGURE S1 Hysteresis of actin networks with various strain rates ( $\dot{\gamma}_{\text{eff}}$ ). Colors indicate different  $\dot{\gamma}_{\text{eff}}$ , and solid lines represent a stretching phase with dashed ones indicating a restoring phase (*legend*). The control case (*magenta*) has no unbinding event, corresponding to very large  $\dot{\gamma}_{\text{eff}}$ .

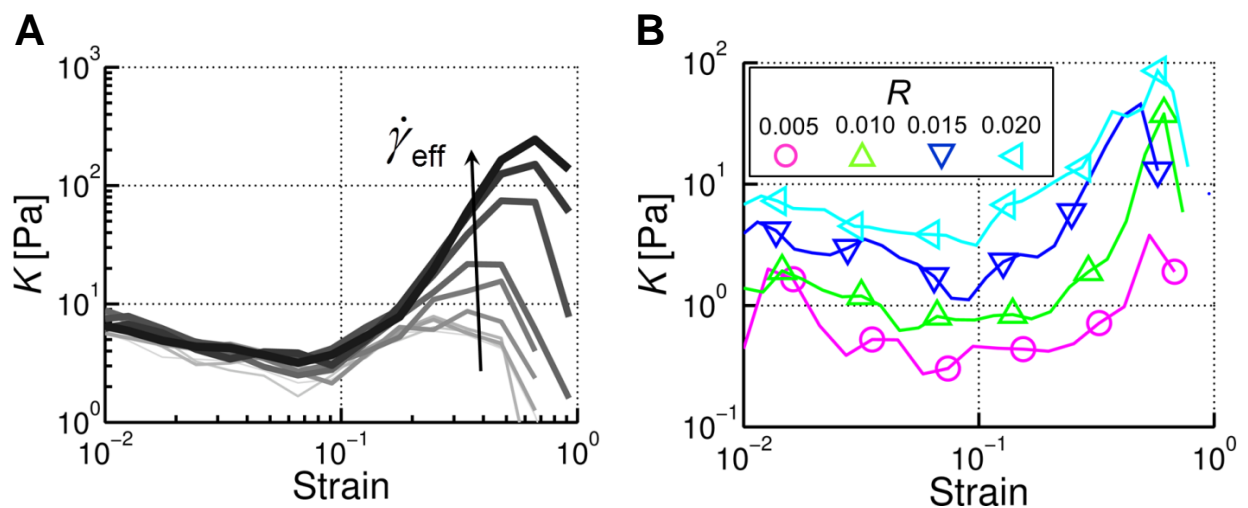

FIGURE S2 Differential modulus,  $K$ , with various (A)  $\dot{\gamma}_{\text{eff}}$  and (B)  $R$ . (A)  $\dot{\gamma}_{\text{eff}}$  is varied at 0.001-1  $\text{s}^{-1}$ . Darker and thicker lines indicate greater  $\dot{\gamma}_{\text{eff}}$ . (B) Symbols and colors indicate different  $R$  (*legend*).

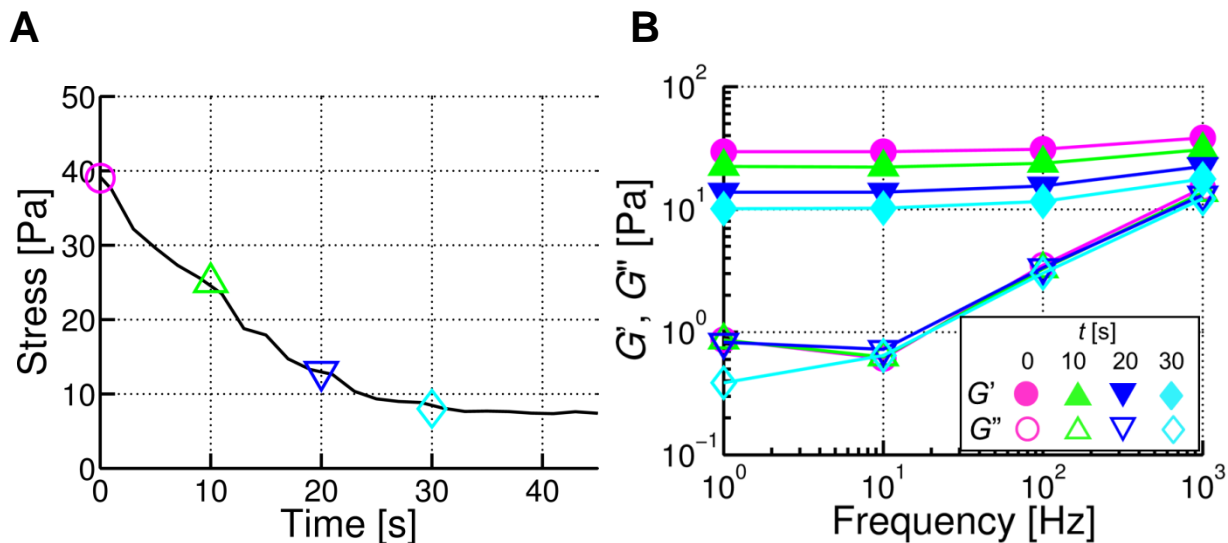

FIGURE S3 Aging of actin networks. (A) A stress relaxation curve of an actin network after shearing to  $\gamma = 0.5$  without unbinding. Networks were extracted at  $t = 0$  (magenta circles), 10 (green triangles), 20 (blue inverted-triangles), and 30 s (cyan diamonds). (B)  $G'$  (solid) and  $G''$  (open) of the networks extracted from (A).

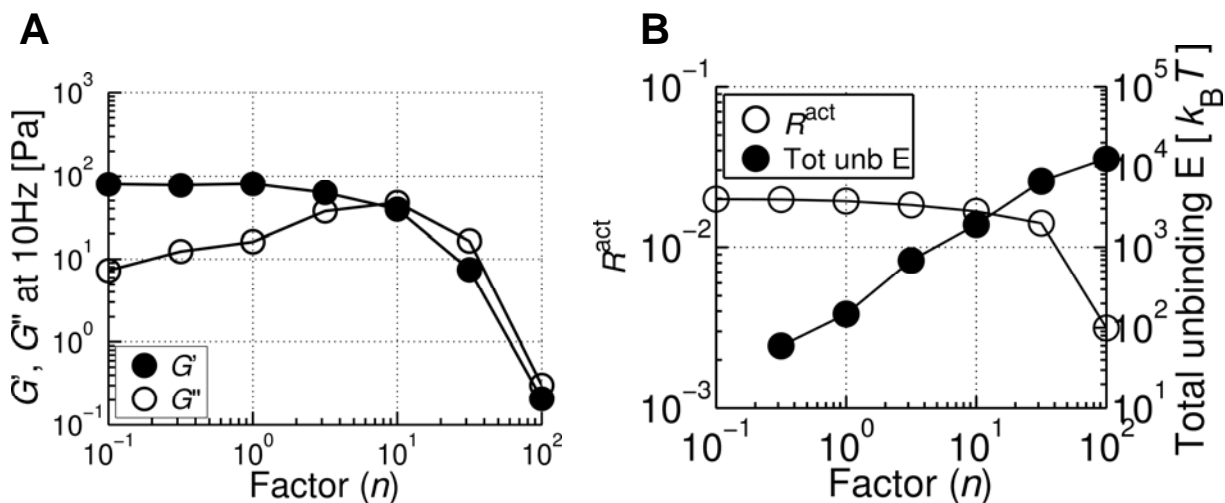

FIGURE S4 (A)  $G'$  (solid) and  $G''$  (open) at 10 Hz with various  $k_{\text{ub}}^0 (= n \times k_{\text{ub},r}^0)$ . (B) Density of active ACPs bound to two filaments,  $R^{\text{act}}$ , (open) and the sum of energy dissipated by unbinding of ACPs bearing more than 1 pN (solid).

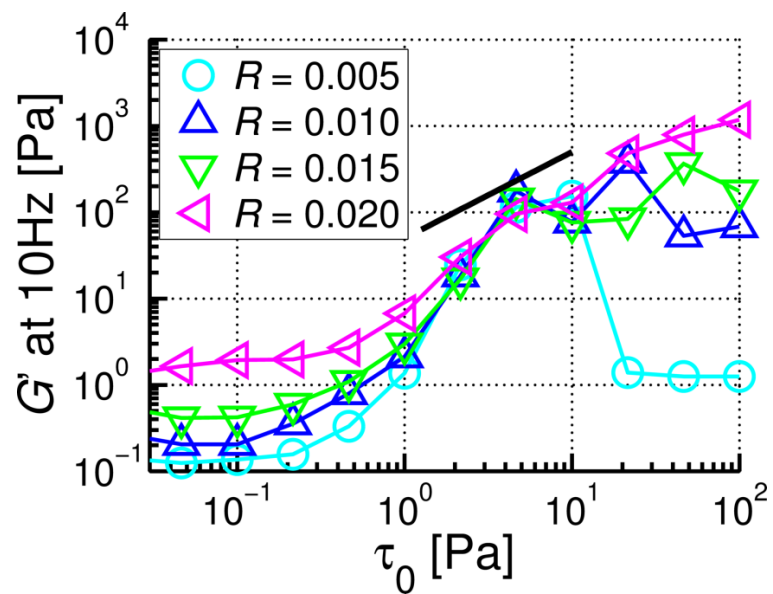

FIGURE S5  $G'$  depending on prestress ( $\tau_0$ ) level with various  $R$  (*legend*). The black line indicates linear scaling,  $G' \sim \tau_0$ .
